1 Study Protocol

2 **Device-aided therapies (DATs) in Parkinson's disease (PD). The**  
3 **DATs-PD GETM Spanish Registry Protocol Study.**

4 **Santos-García D<sup>1,2,3,4</sup>, González-Ortega G<sup>5</sup>, Sánchez Alonso P<sup>6</sup>, Planas-Ballvé A<sup>7</sup>, García**  
5 **Ramos R<sup>8</sup>, Cabo López I<sup>9</sup>, Blázquez Estrada M<sup>10</sup>, Sánchez Ferro A<sup>11,12</sup>; DATs-PD GETM**  
6 **Spanish Registry Group (Appendix 1).**

7 <sup>1</sup>CHUAC, Complejo Hospitalario Universitario de A Coruña, A Coruña, Spain. <sup>2</sup>Grupo de  
8 Investigación en Enfermedad de Parkinson y otros Trastornos del Movimiento, INIBIC (Instituto  
9 de Investigación Biomédica de A Coruña), A Coruña, Spain. <sup>3</sup>Hospital San Rafael, A Coruña.  
10 <sup>4</sup>Fundación Degen, A Coruña, Spain. <sup>5</sup>Hospital Universitario de Móstoles, Madrid, Spain.  
11 <sup>6</sup>Hospital Universitario Puerta de Hierro, Madrid, Spain. <sup>7</sup>Complex Hospitalari Moisès Broggi,  
12 Sant Joan Despí, Llobregat, Barcelona, Spain. <sup>8</sup>Hospital Universitario Clínico San Carlos,  
13 Madrid, Spain. <sup>9</sup>Complejo Hospitalario Universitario de Pontevedra, Pontevedra, Spain.  
14 <sup>10</sup>Hospital Universitario Central de Asturias (HUCA), Oviedo, Spain. <sup>11</sup>Hospital Universitario 12  
15 de Octubre, Madrid, Spain. <sup>12</sup>Centro de Investigación Biomédica en Red sobre Enfermedades  
16 Neurodegenerativas (CIBERNED), Madrid, Spain; Department of Medicine, Universidad  
17 Complutense, Madrid, Spain

18

19 **Word count:** abstract 250; text, 2,591 (without references). **Tables:** 1. **Figures:** 1.

20 **Supplementary Material:** None.

21 **Running title:** Device-aided therapies in Parkinson's disease.

It is made available under a [CC-BY 4.0 International license](#) .

Device-aided therapies in Parkinson's disease

22 **Keywords:** Device-aided therapies; Deep Brain stimulation; Infusion; Parkinson's disease;  
23 Registry.

24 **\*Corresponding author:**

25 Dr. Diego Santos García, Department of Neurology, Hospital Universitario de A Coruña (HUAC),  
26 Complejo Hospitalario Universitario de A Coruña (CHUAC), C/ As Xubias 84, 15006, A Coruña,  
27 Spain; e-mail: [diegosangar@yahoo.es](mailto:diegosangar@yahoo.es); Tel: + 34 646173341.

28

29 **Abbreviations:** ADL, activities of daily living; CSAI, continuous subcutaneous apomorphine  
30 infusion; DATs, device-aided therapies; DBS, deep brain stimulation; fLD/fCD, foslevodopa-  
31 foscarnidopa; LCIG, levodopa-carbidopa intestinal gel infusion; LECIG, levodopa-entacapone-  
32 carbidopa intestinal gel infusion; LEED, levodopa equivalent daily dose; PD, Parkinson's  
33 disease; UPDRS, Unified Parkinson's Disease Rating Scale.

34

35

36

37

38

39

40

41

42

43

44 **ABSTRACT**

45 **Background and objective:** Device-aided therapies (DATs) are treatments indicated for people  
46 with Parkinson's disease (PwP) with clinical fluctuations that are not optimally controlled with  
47 conventional medication. New DATs have recently emerged such as levodopa-entacapone-  
48 carbidopa intestinal gel infusion (LECIG) and subcutaneous infusion of  
49 foslevodopa/foscarbidopa (fLD/fCD). It is necessary to know the differences between different  
50 DATs.

51 **Patients and Methods:** We present here the protocol study of the DATs-PD GETM Spanish  
52 Registry. This is a descriptive, observational, prospective, multicenter, open study that is  
53 proposed as a clinical registry with progressive inclusion of PwP treated with a DAT in daily  
54 clinical practice conditions in more 40 centers from Spain for 10 years. The principal aim is to  
55 know the type of DAT that PwP in our country (Spain) receive. Specific objectives are to  
56 compare the clinical characteristics of the patients, the effectiveness, safety and tolerability, to  
57 identify predictors of a good response and to analyze the response by groups (gender, disease  
58 duration, phenotype, etc.). There is a baseline visit (V1; indication of the therapy), start visit (V2;  
59 initiation of the therapy) and follow-up visits at 6 months  $\pm$  3 months (V3\_6M) and after this  
60 annually  $\pm$  3 months (V3\_12M, V3\_24M, etc.).

61 **Results:** The registry is on-going. The first patient was included on April 10, 2024. Patient  
62 recruitment and follow-up will be conducted until 31/DEC/2033. The estimate is to reach a  
63 minimum sample size of at least 3,000 patients.

64 **Conclusion:** The present study will help improve the care of PD patients treated with a DAT.

65

It is made available under a [CC-BY 4.0 International license](https://creativecommons.org/licenses/by/4.0/) .

Device-aided therapies in Parkinson's disease

66 **Authors' Roles:**

67 **Santos-García** D: conception, organization, and execution of the project; funding acquisition;  
68 supervision; writing of the first draft of the manuscript; recruitment and/or evaluation of  
69 participants; entering data into the database. **González-Ortega** G: preparation and  
70 development of the database; registration of participants in the platform; recruitment and/or  
71 evaluation of participants; entering data into the database; review and critique. **Sánchez**  
72 **Alonso** P: recruitment and/or evaluation of participants; entering data into the database; review  
73 and critique. **Planas-Ballvé** A: recruitment and/or evaluation of participants; entering data into  
74 the database; review and critique. **García Ramos** R: recruitment and/or evaluation of  
75 participants; entering data into the database; review and critique. **Cabo López** I: recruitment  
76 and/or evaluation of participants; entering data into the database; review and critique. **Blázquez**  
77 **Estrada** M: recruitment and/or evaluation of participants; entering data into the database;  
78 review and critique. **Sánchez Ferro** A: collaboration in the coordination of the project as  
79 coordinator of GETM; recruitment and/or evaluation of participants; entering data into the  
80 database; review and critique.

81

82 **Financial Disclosures for the previous 12 months:**

83 **Santos-García** D. has received honoraria for educational presentations and advice service by  
84 Abbvie, UCB Pharma, Lundbeck, KRKA, Zambon, Bial, Italfarmaco, Teva, Archímedes, Esteve,  
85 Stada, Merz, and grants from the "Fundación Professor Novoa Santos" as a result of the  
86 "CONVOCATORIA DE AYUDAS PARA LA REALIZACIÓN DE PROYECTOS DE  
87 INVESTIGACIÓN PARA GRUPOS EMERGENTES Y ASOCIADOS DEL INIBIC (2023/2024)".

It is made available under a [CC-BY 4.0 International license](#) .

Device-aided therapies in Parkinson's disease

88 **González-Ortega G.** has received honoraria for educational purposes from ABBIE, Zambon,  
89 Bial, Esteve and Italfarmaco  
90 **Sánchez Alonso P.** has received honoraria for educational presentations and advice service by  
91 Abbvie, UCB Pharma, Lundbeck, KRKA, Zambon, Bial, and Teva.  
92 **Planas-Ballvé A:** None.  
93 **García Ramos R.** has received honoraria and grants for lecturing, advisory services from  
94 Abbvie, Zambón, Bial, Merk, Stada.  
95 **Cabo López I.** has received honoraria for educational presentations and advice service by  
96 Abbvie, Zambon, Bial, Orion, Italfarmaco and Esteve.  
97 **Blázquez Estrada M.** has received honoraria for educational presentations by Dysport, Esteve,  
98 Bial, Italfarmaco, Boston Sc. and Stada and for advice service by Esteve, Bial, Suazio.  
99 **Sánchez Ferro A.** has received: grants or contracts from ERA-NET Horizon 2020 program  
100 JPCOFUND2 (reference number HESOCARE-329-073), MDS (eDiary project), Instituto de  
101 Salud Carlos III (reference number P122/01177); consulting fees from Abbvie, Esteve, Orion  
102 Pharma, and Prim; and payment or honoraria for lectures, presentations, speakers bureaus,  
103 manuscript writing, or educational events from Abbvie, Bayer, Esteve, MDS Society, EAN,  
104 Novartis, Monitor, Organon, Roche, SEN, Stada, Teva, and Zambon.  
105  
106  
107  
108  
109

## 110 INTRODUCTION

111            Parkinson's disease (PD) is the second most common neurodegenerative disease after  
112 Alzheimer's disease. It is characterized by a deficit of dopamine in the striatum and other brain  
113 areas, but also of other neurotransmitters such as noradrenaline, acetylcholine or serotonin,  
114 which would explain the appearance of motor and non-motor symptoms characteristic of the  
115 disease [1]. The diagnosis is made by applying well-defined criteria [2,3] that are based  
116 fundamentally on the existence of parkinsonism, the absence of atypical data that suggest an  
117 alternative diagnosis (pharmacological, Parkinson-Plus syndrome, etc.), and data in favor that  
118 suggest PD itself. Among the latter, a determining aspect is the good response to dopaminergic  
119 medication, especially levodopa [4]. Its administration compensates for the deficit of  
120 dopaminergic stimulation at the level of the postsynaptic receptors, which causes an  
121 improvement in symptoms such as tremor, rigidity or bradykinesia, among others. In fact, the  
122 absence of a response would go against the diagnosis of PD.

123            Although the response to dopaminergic medication may be optimal during the first few  
124 years, people with PD (PwP) develop motor and non-motor complications (e.g., motor  
125 fluctuations, non-motor fluctuations, dyskinesias, etc.) that impact their quality of life and  
126 autonomy [5]. Thus, PwP may only perceive improvement at certain times of the day alternating  
127 with disabling OFF episodes where the symptoms reemerge and the control with conventional  
128 medication is insufficient [6]. Some PwP may benefit from treatment with a second-line therapy  
129 that is an alternative and/or complement to conventional medication that is not sufficient [7]. The  
130 proper selection of the candidates is key, and there are different tools for their correct  
131 identification [8]. These therapies are commonly known as device-aided therapies (DATs) and

It is made available under a [CC-BY 4.0 International license](https://creativecommons.org/licenses/by/4.0/) .

Device-aided therapies in Parkinson's disease

132 although they are more expensive and complex than conventional medication, they have been  
133 shown to reduce OFF time, improve non-motor symptoms and the quality of life of PwP [9]. For  
134 many years the available DATs in many countries have been the deep brain stimulation (DBS),  
135 continuous subcutaneous apomorphine infusion (CSAI) and levodopa-carbidopa intestinal gel  
136 infusion (LCIG) [10]. However, new treatments have recently emerged, such as levodopa-  
137 entapacone-carbidopa intestinal gel infusion (LECIG) and subcutaneous infusion of  
138 foslevodopa-foscarbidopa (fLD/fCD) [11,12]. Particularly relevant is the recent availability of  
139 fLD/fCD subcutaneous infusion to the point that many recently published treatment algorithms  
140 are outdated and the possibility of considering the subcutaneous route as the first alternative to  
141 the enteral route is being discussed, as it is less invasive when considering infusion therapy  
142 [13,14].

143 Therefore, a completely new scenario is opening up in the treatment of PwP with a DAT  
144 and it is essential to know the frequency of the prescriptions, the characteristics of the treated  
145 individuals as well as their long-term evolution in relation to clinical changes and complications.  
146 This is the reason why, from the Movement Disorders Study Group (Grupo de Estudio de  
147 Trastornos de Movimiento [GETM]) of the Spanish Neurological Society (Sociedad Española de  
148 Neurología [SEN]), we have launched a prospective registry of PwP treated with a DAT in our  
149 country (Spain). The aim of this article is to describe this registry that we have named DATs-PD  
150 GETM Spanish Registry.

151

152 **METHODS/DESIGN**

It is made available under a [CC-BY 4.0 International license](https://creativecommons.org/licenses/by/4.0/) .

Device-aided therapies in Parkinson's disease

153 **Title of the Project:** Device-aided therapies in Parkinson's disease GETM Spanish Registry  
154 (DATs-PD GETM Spanish Registry).

155 **Type of study:** Descriptive, observational, prospective, multicenter, open study that is proposed  
156 as a clinical registry with progressive inclusion of patients with PwP treated with a DAT in daily  
157 clinical practice conditions.

158 **Promoter and principal coordinator of the project:** Diego Santos García, MD, PhD.

159 **Coordinating institutions:** "Fundación Degen", "Grupo de Estudio de Trastornos del  
160 Movimiento (GETM)" and "Sociedad Española de Neurología (SEN)".

161 **Participating centers in the project:** More than 40 centers from Spain with neurology teams  
162 with experience in the management of PD (**Appendix 1**), including the use of DATs.

163 **Population:** PwP treated with a DAT in Spain from year 2024. The following therapies are  
164 included as DATs: DBS; CSAI; LCIG; LECIG; and fLD/fCD subcutaneous infusion. In addition,  
165 PwP who are treated with focused ultrasound-guided thermal ablation will also be included.  
166 Specifically, the eligibility criteria are: 1) diagnosis of PD according to the MDS criteria; 2) start  
167 of treatment with a DAT from January 1, 2024; 3) the patient's desire to participate on a  
168 completely voluntary basis; 4) signing of an informed consent.

169 **Justification of the project:** 1) there are many DATs currently used to treat PwP; 2) some of  
170 them have been introduced very recently and we have no experience; 3) in this context, we  
171 must know about the indication preferences in Spanish centers that treat PwP; 4) we must know  
172 the characteristics of the individuals treated and the differences between therapies; 4) we must  
173 know the effectiveness of DATs and to compare them; 5) we must know the safety and



It is made available under a [CC-BY 4.0 International license](#) .

Device-aided therapies in Parkinson's disease

174 tolerability of DATs and to compare them; 6) it is necessary to define different response profiles  
175 or predictors of better or worse outcome; 7) this is an excellent opportunity to be able to develop  
176 a registry at this time that collects a lot of information over the long term; 8) It could be a starting  
177 point to which centers from other countries can join and develop a broader registry (e.g.,  
178 European, etc.).

## 179 **Objectives**

180 **Principal objective:** to know the type of DAT that PwP in our country receive, treated by expert  
181 neurologists in daily clinical practice conditions.

182 **Specific objectives:** 1) to analyze the sociodemographic and clinical characteristics of PwP  
183 treated with a DAT, comparing the different treatments (DBS vs subcutaneous vs enteral  
184 treatment); 2) to analyze the effectiveness of different DATs, comparing the different treatments  
185 (DBS vs subcutaneous vs enteral treatment); 3) to analyze the safety and tolerability of different  
186 DATs, comparing the different treatments; 4) specifically, to analyze the changes experienced  
187 by PwP treated with DATs in the perception of their quality of life and autonomy for carrying out  
188 daily activities and to compare the different treatments; 5) specifically, to compare the rate of  
189 maintenance of the therapy between the different DAT groups; 6) specifically, to compare the  
190 dropout rate for each of the therapies and find out the underlying reasons; 7) to find out the  
191 reasons for changing from one therapy to another or adding a second DAT to a previous one  
192 being received; 8) to analyze the complications in relation to the different DATs and compare  
193 them; 9) to compare the differences by gender (male vs. female); 10) others that may be raised  
194 based on the data collected (e.g., differences by age, disease duration etc.).

## 195 **Visits**

It is made available under a [CC-BY 4.0 International license](https://creativecommons.org/licenses/by/4.0/) .

Device-aided therapies in Parkinson's disease

196 The registry includes 3 types of visits: 1) baseline visit (V1), which is when the DAT is decided  
197 by the neurologist; 2) start visit (V3), which is when the DAT is initiated by the patient; 3) follow-  
198 up visit (V3), with the patient receiving the DAT. The first follow-up visit will be carried out at 6  
199 months +/- 3 months (V3\_6M) and then at 1 year +/-3 months and subsequently annually +/- 3  
200 months: 1 year (V3\_12M); 2 years (V3\_24M); 3 years (V3\_36M); 4 years (V3\_48M); 5 years  
201 (V3\_60M); etc. (**Figure 1**).

202 The period of inclusion of patients in the registry will be a minimum of 5 years, extendable to 10  
203 years according to the approved protocol. New PwP will be included over a 10-year period,  
204 while each participant's included will be follow-up during this time. The data collection period  
205 ranges from January 1, 2024 to December 31, 2033. If a person with PD switches to another  
206 DAT or a second DAT is added, the information will be collected. In addition, if a subject drops  
207 out of the DAT and does not receive another DAT, data collection will continue within the  
208 registry to allow for a comparative arm of untreated patients after a therapeutic failure  
209 (something rarely discussed in the literature). Although the registry is prospective, it is planned  
210 to include PwP treated in 2024 whose indication for DAT was before this year, as long as the  
211 data was properly collected in the medical record. An example is DBS, given that the waiting list  
212 from indication to intervention is long in some centers.

### 213 **Assessments**

214 The following information will be collected at each visit:

- 215 1) Baseline visit (V1): sociodemographic data; data about PD (age onset, disease duration,  
216 motor phenotype, etc.); comorbidities; treatments; main reason for therapy indication;  
217 levodopa equivalent daily dose (LEDD) [15]; motor symptoms; non-motor symptoms;

218 Unified Parkinson's Disease Rating Scale (UPDRS-III) [16] during the OFF state;  
219 UPDRS-III during the ON state; Hoehn & Yahr (H&Y) [17] stage in OFF; H&Y stage in  
220 ON; MNCD classification (classification; score; stage) [18]; Parkinson's Disease  
221 Questionnaire (PDQ-39) [19]; EUROHIS-QOL 8-item index [20]; Schwab and England  
222 Activities of Daily Living Scale (ADLS) [21] during the OFF and during the ON state;  
223 serum levels of folate, B vitamins (B1, B6, B12) and homocysteine.

224 2) Start visit (V2): data about the DAT and treatment settings including LEDD.

225 3) Follow-up visit (V3): data about the DAT and treatment settings including LEDD;  
226 comorbidities; treatments; LEDD; motor symptoms; non-motor symptoms; UPDRS-III  
227 during the ON state; H&Y stage in ON; MNCD classification (classification; score; stage);  
228 Parkinson's Disease Questionnaire (PDQ-39); EUROHIS-QOL 8-item index; ADLS  
229 during the OFF and during the ON state; serum levels of folate, B vitamins (B1, B6, B12)  
230 and homocysteine; complications about the DAT and/or other relevant complications.

231 All information will be collected by expert neurologists in a daily clinical practice setting. A  
232 total of 16 and 26 questions collect information on motor symptoms/complications and non-  
233 motor symptoms, respectively, which are categorized as absent, mild, moderate, severe, or  
234 very severe. The score on the MDS-UPDRS-III scale [22] will be an added option that will be  
235 collected in those centers that use it (permission by the MDS was obtained). **Table 1**  
236 summarizes the information on the variables that will be collected during the different visits.

### 237 **Data collection and statistical analysis**

238 Data will be collected using REDCap. This is a secure web application for building and  
239 managing online surveys and databases. REDCap has been used to date (27/NOV/2024) in

It is made available under a [CC-BY 4.0 International license](#) .

Device-aided therapies in Parkinson's disease

240 159 countries by more than 3.4 million users. Data collected will be transferred to a statistical  
241 package for subsequent analysis. The promoter team of the project will be responsible for study  
242 monitoring. The estimate, with the participation of more than 40 centers and a recruitment  
243 period of 10 years, is to be able to reach a minimum sample size of 3,000 patients. The  
244 pertinent analysis (descriptive, missing data analysis, normality assumptions, univariate, binary  
245 logistic regression, multiple linear regression, etc.) will be performed based on the type of  
246 objective. In addition, given the complexity of potential analysis including a diversity of variables  
247 from different origin and measurement properties, advanced statistical methodology (data  
248 mining, machine learning or other artificial intelligence techniques, etc.) could be considered  
249 when applicable.

#### 250 **Standard protocol approvals, registrations, and patient consents**

251 The project will be conducted in accordance with the ICH Good Clinical Practice version  
252 6 Revision 2 standard, the fundamental ethical principles established in the Declaration of  
253 Helsinki and the Oviedo Convention, as well as the Spanish legal requirements for biomedical  
254 research (Biomedical Research Law 14/2007). The Project has been approved on 02/APR/2024  
255 by the IRB "Comité de Ética de la Investigación Clínica de Galicia from Spain" with code  
256 number 2024/109. Written informed consents from all participants in this study will be obtained.

#### 257 **Data availability**

258 The protocol, statistical analysis plan and deidentified participant data will be available  
259 on request.

#### 260 **Study timetable**

261 1) Pre-start-up procedures: until April 2024.

262 2) First patient included: 10/APR/2024.

263 3) First analysis to present: 2025 – Q1 (data about PD patients treated in 2024).

264 4) Proposed specific objectives and others: from 2025 onwards.

## 265 **Funding statement**

266 An amount of 25.000 euros has been granted by the “Fundación Professor Novoa Santos” as a  
267 result of the "CONVOCATORIA DE AYUDAS PARA LA REALIZACIÓN DE PROYECTOS DE  
268 INVESTIGACIÓN PARA GRUPOS EMERGENTES Y ASOCIADOS DEL INIBIC (2023/2024)".

269 The import will be used for data monitoring and other actions required in the context of the  
270 project.

## 271 **Strengths and limitations of the project**

272 The main strength of the project is the possibility of collecting systematic information on patients  
273 treated with DATs over a long follow up period (10 years). Further, there is great interest in the  
274 fact that some of these therapies are novel and the management of advanced PD patients is  
275 changing because of this and could hence be evaluated. Also, the methodology with  
276 prospective follow-up and the collection of well-defined variables (UPDRS, H&Y, PDQ-39,  
277 ADLS, etc.) in a clinical practice setting will allow generalizing the findings to other  
278 environments. To this end, we also consider in the future increasing the number of centers in  
279 Spain, and even the chance of extrapolating the registry to other countries harmonizing the data  
280 collected. Other future possibilities are implementing new technologies to monitor the disease  
281 and analyze the changes after starting with the DAT and their correlation with the data collected  
282 from the registry.

It is made available under a [CC-BY 4.0 International license](https://creativecommons.org/licenses/by/4.0/) .

Device-aided therapies in Parkinson's disease

283 On the other hand and as limitations, unlike a study with a clearly defined protocol in which  
284 multiple scales are administered [23], this project is a registry, and limitations in the quantity and  
285 quality of the data collected are possible. For example, the number and description of  
286 complications may be underestimated. At this moment the project is exciting but there is some  
287 residual risk that it will not work properly due to the workload of researchers.

288

## 289 **DISCUSSION**

290 According to the PARADISE study, a non-interventional, cross-sectional, multicenter,  
291 national study conducted in the hospital setting and published in 2021, up to 38.2% of people  
292 with PD in Spain have advanced PD [24]. The key aspect of identifying advanced PD is to  
293 differentiate which PwP could be candidates to receive a DAT. However, only 15.2% of PwP  
294 from the advanced PD group from the PARADISE study were receiving some form of therapy  
295 for advanced stages of the disease (i.e., DBS, CSAI, LCIG). The most frequent reasons why  
296 advanced PwP were not on a DAT were “to be clinically stable” and “option not yet considered”.  
297 Similar results were observed in the PROSPECT study [25], in which only 20.9% of PwP (adults  
298 with levodopa-responsive PD and inadequately controlled motor symptoms with  $\geq 2.5$ -hours/day  
299 “Off” time, despite trials of available oral/transdermal/sublingual/inhalable medication) initiated a  
300 DAT despite the fact that, as expected, DAT vs best medical therapy improved motor  
301 symptoms, non-motor symptoms, sleep, quality of life, independence for ADL and caregiver  
302 burden. For many years, the options for being treated with a DAT meant choosing between  
303 three alternatives: DBS, CSAI, LCIG. However, the scenario is new with the current availability  
304 of LECIG and subcutaneous fLD/fCD. In particular, it is of maximum interest to know whether

It is made available under a [CC-BY 4.0 International license](#) .

Device-aided therapies in Parkinson's disease

305 the arrival of fLD/fCD implies a reduction in the indication of other treatments and what are the  
306 characteristics of the treated patients as well as their complications in comparison with other  
307 DATs, especially enteral therapies [26]. This registry aims to answer this question and many  
308 others explained in the objectives. We believe that the information collected in the DATs-PD  
309 GETM Spanish Registry will be of great interest in helping to improve the management of  
310 people with Parkinson's disease treated with a DAT.

311 In summary, we present here the protocol study of the DATs-PD GETM Spanish  
312 Registry, a descriptive, observational, prospective, multicenter, open study that is proposed as a  
313 clinical registry with progressive inclusion of PwP treated with a DAT in daily clinical practice  
314 conditions in more 40 centers from Spain for 10 years. The present study will help improve the  
315 care of PwP treated with a DAT.

316

317

318

319

320

321

322

323

324

325

326

It is made available under a [CC-BY 4.0 International license](https://creativecommons.org/licenses/by/4.0/) .

Device-aided therapies in Parkinson’s disease

327 **Table 1.** Variables collected in the DAT-PD Spanish Registry according to the type of visit.

| V1                     | V2                     | V3                     |
|------------------------|------------------------|------------------------|
| Sociodemographic       | Information about DAT  | Information about DAT  |
| PD history             | Concomitant treatments | Concomitant treatments |
| Comorbidities          | LEDD                   | LEDD                   |
| Concomitant treatments |                        | PD symptoms            |
| LEDD                   |                        | Motor symptoms         |
| Main reason for DAT    |                        | Non-motor symptoms     |
| PD symptoms            |                        | Motor scales           |
| Motor symptoms         |                        | UPDRS-III-OFF          |
| Non-motor symptoms     |                        | UPDRS-III ON           |
| Motor scales           |                        | H&Y-OFF                |
| UPDRS-III-OFF          |                        | H&Y-ON                 |
| UPDRS-III ON           |                        | Quality of life        |
| H&Y-OFF                |                        | PDQ-39                 |
| H&Y-ON                 |                        | EUROHIS-QOL8           |
| Quality of life        |                        | Functional dependency  |
| PDQ-39                 |                        | ADLS-OFF               |
| EUROHIS-QOL8           |                        | ADLS-ON                |
| Functional dependency  |                        | Serum biomarkers       |
| ADLS-OFF               |                        | Folate                 |
| ADLS-ON                |                        | Vitamin B1             |
| Serum biomarkers       |                        | Vitamin B6             |
| Folate                 |                        | Vitamin B12            |
| Vitamin B1             |                        | Homocysteine           |
| Vitamin B6             |                        | Complications          |
| Vitamin B12            |                        | Related with DAT       |
| Homocysteine           |                        | Unrelated with DAT     |

328

329 ADLS, Schwab & England Activities of Daily Living Scale; DAT, device-aided therapy; LEDD, levodopa equivalent  
 330 daily dose; PD, Parkinson’s disease; PDQ-39, the 39-item Parkinson’s disease Questionnaire; UPDRS, Unified  
 331 Parkinson’s Disease Rating Scale.

332

333

334

335

336

337

338

339



## 340 **References**

- 341 1. Bloem BR, Okun MS, Klein C. Parkinson's disease. *Lancet* 2021;397:2284-303.
- 342 2. Hughes AJ, Daniel SE, Kilford L, Lees AJ. Accuracy of clinical diagnosis of idiopathic  
343 Parkinson's disease: a clinico-pathological study of 100 cases. *J Neurol Neurosurg*  
344 *Psychiatry* 1992;55:181-4.
- 345 3. Postuma RB, Berg D, Stern M, Poewe W, Olanow CW, Oertel W, et al. MDS clinical  
346 diagnostic criteria for Parkinson's disease. *Mov Disord* 2015;30:1591-601.
- 347 4. Santos-García D, de us Fonticoba T, Cores Bartolomé C, et al.; COPPADIS Study Group.  
348 Response to levodopa in Parkinson's disease over time. A 4-year follow-up study.  
349 *Parkinsonism Relat Disord* 2023;116:105852.
- 350 5. Hauser RA, McDermott MP, Messing S. Factors associated with the development of motor  
351 fluctuations and dyskinesias in Parkinson disease. *Arch Neurol* 2006;63:1756-60.
- 352 6. Kakimoto A, Kawazoe M, Kurihara K, Mishima T, Tsuboi Y. Impact of non-motor fluctuations  
353 on QOL in patients with Parkinson's disease. *Front Neurol* 2023;14:1149615.
- 354 7. Deuschl G, Antonini A, Costa J, et al. European Academy of Neurology/Movement Disorder  
355 Society-European Section Guideline on the Treatment of Parkinson's Disease: I. Invasive  
356 Therapies. *Mov Disord* 2022;37:1360-74.
- 357 8. Moes HR, Henriksen T, Sławek J, Phokaewvarangkul O, Buskens E, van Laar T. Tools and  
358 criteria to select patients with advanced Parkinson's disease for device-aided therapies: a  
359 narrative review. *J Neural Transm (Vienna)* 2023;130:1359-77.
- 360 9. Phokaewvarangkul O, Auffret M, Groppa S, Markovic V, Petrovic I, Bhidayasiri R. What was

- 361 first and what is next in selecting device-aided therapy in Parkinson's disease? Balancing  
362 evidence and experience. *J Neural Transm (Vienna)* 2024;131:1307-20.
- 363 10. Auffret M, Weiss D, Stocchi F, Vérin M, Jost WH. Access to device-aided therapies in  
364 advanced Parkinson's disease: navigating clinician biases, patient preference, and  
365 prognostic uncertainty. *J Neural Transm (Vienna)* 2023;130:1411-32.
- 366 11. Santos-García D, López-Manzanares L, Muro I, et al. Effectiveness and safety of levodopa-  
367 entacapone-carbidopa infusion in Parkinson disease: A real-world data study. *Eur J Neurol*  
368 2024 (epub ahead of print).
- 369 12. Soileau MJ, Aldred J, Budur K, et al. Safety and efficacy of continuous subcutaneous  
370 foslevodopa-foscarbidopa in patients with advanced Parkinson's disease: a randomised,  
371 double-blind, active-controlled, phase 3 trial. *Lancet Neurol* 2022;21(12):1099-109.
- 372 13. Antonini A, D'Onofrio V, Guerra A. Current and novel infusion therapies for patients with  
373 Parkinson's disease. *J Neural Transm (Vienna)* 2023;130:1349-58.
- 374 14. Aubignat M, Tir M. Continuous Subcutaneous Foslevodopa-Foscarbidopa in Parkinson's  
375 Disease: A Mini-Review of Current Scope and Future Outlook. *Mov Disord Clin Pract*  
376 2024;11:1188-94.
- 377 15. Nyholm D, Jost WH. An updated calculator for determining levodopa-equivalent dose.  
378 *Neurol Res Pract* 2021;3:58.
- 379 16. Fahn S, Elton RL, Members of the UPDRS Development Committee. Unified Parkinson's  
380 Disease Rating Scale. In: Fahn S, Marsden CD, Calne DB, Goldstein M, editors. *Recent*  
381 *developments in Parkinson's disease, Vol 2*. Florham Park, NJ: Macmillan Health Care

382 Information;1987.p-153-64.

383 17. Hoehn MM, Yahr MD. Parkinsonism: onset, progression and mortality. *Neurology*

384 1967;17:427-42.

385 18. Santos García D, Álvarez Sauco M, Calopa M, et al. MNCD: A New Tool for Classifying

386 Parkinson's Disease in Daily Clinical Practice. *Diagnostics (Basel)* 2021;12:55.

387 19. Jenkinson C, Fitzpatrick R, Peto V, Greenhall R, Hyman N. The Parkinson's Disease

388 Questionnaire (PDQ-39): development and validation of a Parkinson's disease summary

389 index score. *Age Ageing* 1997;26:353-7.

390 20. Da Rocha NS, Power MJ, Bushnell DM, Fleck MP. The EUROHIS-QOL 8-item index:

391 comparative psychometric properties to its parent WHOQOL-BREF. *Value Health*

392 2012;15:449-57.

393 21. Schwab RS, England AC. In *Third Symposium on Parkinson's disease*. E. And S.

394 Livingstone: Edinburgh 1969;152-7.

395 22. Goetz CG, Tilley BC, Shaftman SR, et al.; Movement Disorder Society UPDRS Revision

396 Task Force. Movement Disorder Society-sponsored revision of the Unified Parkinson's

397 Disease Rating Scale (MDS-UPDRS): scale presentation and clinimetric testing results. *Mov*

398 *Disord* 2008;23:2129-70.

399 23. Santos-García D, Mir P, Cubo E, Vela L, et al.; COPPADIS Study Group. COPPADIS-2015

400 (COhort of Patients with PARKinson's Disease in Spain, 2015), a global--clinical evaluations,

401 serum biomarkers, genetic studies and neuroimaging--prospective, multicenter, non-

402 interventional, long-term study on Parkinson's disease progression. *BMC Neurol*

It is made available under a [CC-BY 4.0 International license](#) .

Device-aided therapies in Parkinson's disease

403 2016;16:26.

404 24. Martínez-Castrillo JC, Martínez-Martín P, Burgos Á, et al. Prevalence of Advanced  
405 Parkinson's Disease in Patients Treated in the Hospitals of the Spanish National Healthcare  
406 System: The PARADISE Study. Brain Sci 2021;11(12):1557.

407 25. Dean MN, Standaert DG. Levodopa infusion therapies for Parkinson disease. Curr Opin  
408 Neurol 2024;37:409-413.

409 26. de Fabregues O, Falconer D, Heshmat S, et al. Long-Term Evolution of Advanced  
410 Parkinson's Disease Burden: Subgroup Analysis from the 24 Month International  
411 PROSPECT Observational Study [abstract]. Mov Disord 2024;39(suppl 1).

412

413

414

415

416

417

418

419

420

421

422

423

424

It is made available under a [CC-BY 4.0 International license](https://creativecommons.org/licenses/by/4.0/) .

Device-aided therapies in Parkinson's disease

## 425 **Legend of Figures**

426 **Figure 1.** All patients treated with a DAT from 2024 to 31/DEC/2033 in more than 40  
427 participating centers from Spain are included, all of them evaluated by neurologists who are  
428 experts in PD. Each color refers to a different patient. There is a baseline visit (V1; indication of  
429 the therapy), start visit (V2; initiation of the therapy) and follow-up visits at 6 months (V3\_6M)  
430 and after this annually (V3\_12M, V3\_24M, etc.). The window for V2 and V3 is  $\pm$  3 months.

431

## 432 **Acknowledgements**

433 We would like to thank all patients who collaborated in this study. Many thanks also to  
434 Fundación Española de Ayuda a la Investigación en Enfermedades Neurodegenerativas y/o de  
435 Origen Genético (<https://fundaciondegen.org/>), Grupo de Estudio de Trastornos del Movimiento  
436 (GETM), Sociedad Española de Neurología (SEN) and Fundación Profesor Novoa Santos.

437

438

439

440

441

442

443

444

445

446

447 **Appendix 1.**

448 **DATs-PD GETM Spanish Registry STUDY GROUP**

449 Adarmes Gómez AD, Alonso Modino D, Álvarez Saucó M, Aneiros Díaz A, Ávila Rivera A,  
450 Baviera-Muñoz R, Belmonte S, Blázquez Estrada M, Caballero Sánchez L, Caballol Pons N,  
451 Cabo López I, Campins Romeu M, Campolongo A, Cantarero Duque S, Carrillo García F,  
452 Casanova Mollá J, Casas Peña E, Castaño García B, Castellano Guerrero AM, Castrillo Sanz  
453 A, Cerdán Santacruz DM, Clavero Ibarra P, Cores Bartolomé C, Cots Foraster A, Cubo Delgado  
454 E, Delgado Ballesteros T, Erdocia Goñi A, Escalante Arroyo S, Escamilla Sevilla F, Espinosa  
455 Rosso R , Fanjul Arbos S, Feliz Feliz C, Fernández Pajarín G, Fernández Revuelta A,  
456 Fernández Rodríguez B, Fernández Valle T, Freire Álvarez E, Gamo González E, García  
457 Fernández C, García Herruzo A, García Ramos García R, García Ruíz Espiga P, Garrote  
458 Espina L, Gil Villar MP, Gómez Esteban JC, Gómez López de San Román C, Gómez  
459 Mayordomo V, Gómez Rapela C, González MV, González Ardura J, González Hernández A,  
460 González-Ortega G, Guerra Hiraldo JD, Gutiérrez García J, Hernández Vara J, Jesús Maestre  
461 S, Kulisevsky Bojarski J, Legarda Ramírez I, López Ariztegui N, López Dominguez D, López  
462 Manzanares L, López Veloso AC, López Valdés E, Lorenzo Barreto P, Lorenzo Brito JM,  
463 Lozano D, Macías García D, Madrid Navarro CJ, Martí Andrés G, Martí Martínez S, Martín  
464 García R, Martínez Castrillo JC, Martínez-Torres I, Mata Álvarez Santullano M, Mauri Fabrega  
465 L, Méndez Guerrero A, Mendoza Rodríguez A, Mir Rivera P, Mondragón Rezola E, Monterde  
466 Ortega A, Morales Casado MI, Morata-Martínez C, Muñoz Delgado L, Muñoz Ruíz T, Muro I,  
467 Novo Ponte S, Ojeda Lepe E, Olivares Romero J, Pagonabarraga J, Pareés Moreno I, Pascual  
468 Sedano B, Paz González JM, Peral Quirós A, Pérez Calvo C, Pérez Rangel D, Perona

It is made available under a [CC-BY 4.0 International license](https://creativecommons.org/licenses/by/4.0/) .

Device-aided therapies in Parkinson's disease

469 Moratalla A, Planas-Ballvé A, Prendes Fernández P, Quibus Requena L, Rábano Suárez P,  
470 Rashid López R, Rebollo Lavado B, Rojas Pérez E, Ribacoba Díaz C, Romero Fábrega JC,  
471 Ruiz López M, Ruíz Martínez J, Samaniego Vinueza LB, San Eufrasio Martínez M, Sánchez  
472 Alonso P, Sánchez Ferro A, Sánchez Rodríguez A, Sancho Saldana A, Santos-García D,  
473 Sastre Bataller I, Sesar Ignacio A, Solano Vila B, Solleiro Vidal A, Suárez San Martín E, Tabar  
474 Comellas G, Tijero Merino B, Triguero Cueva L, Valero García MF, Valldeoriola Serra F, Vela L,  
475 Vinagre Aragón A, Vivas Villacampa L, Vives Pastor B, Yáñez Baña R.

476

| First Name      | Last Name          | Centre                                            |
|-----------------|--------------------|---------------------------------------------------|
| Diego           | Santos García      | Complejo Hospitalario Universitario de A Coruña   |
| Jose Manuel     | Paz González       | Complejo Hospitalario Universitario de A Coruña   |
| Carlos          | Cores Bartolomé    | Complejo Hospitalario Universitario de A Coruña   |
| Lucia Belen     | Samaniego Vinueza  | Complejo Hospitalario Universitario de A Coruña   |
| Ángela          | Solleiro Vidal***  | Complejo Hospitalario Universitario de A Coruña   |
| María           | Álvarez Sauco      | Hospital General Universitario de Elche           |
| Eric            | Freire Álvarez     | Hospital General Universitario de Elche           |
| Juan Carlos     | Martínez Castrillo | Hospital Universitario Ramón y Cajal              |
| Isabel          | Pareés Moreno      | Hospital Universitario Ramón y Cajal              |
| Samira          | Fanjul Arbos       | Hospital Universitario Ramón y Cajal              |
| Ana Belén       | Perona Moratalla   | Complejo Hospitalario Universitario de Albacete   |
| Inés            | Legarda Ramírez    | Hospital Universitario Son Espases                |
| Bàrbara         | Vives Pastor       | Hospital Universitario Son Espases                |
| María Fuensanta | Valero García      | Hospital Universitario Son Espases                |
| Esther          | Cubo Delgado       | Hospital Universitario de Burgos                  |
| Nuria           | López Ariztegui    | Hospital Universitario de Toledo                  |
| Maria Isabel    | Morales Casado     | Hospital Universitario de Toledo                  |
| Guillermo       | Tabar Comellas     | Hospital Universitario de Toledo                  |
| Déborah         | Alonso Modino      | Hospital Universitario de la Candelaria           |
| Jesús Norelis   | Lorenzo Brito      | Hospital Universitario de la Candelaria           |
| Esther          | Rojas Pérez        | Hospital Universitario de la Candelaria           |
| Iria            | Cabo López         | Complejo Hospitalario Universitario de Pontevedra |

It is made available under a [CC-BY 4.0 International license](https://creativecommons.org/licenses/by/4.0/).

Device-aided therapies in Parkinson's disease

|                |                    |                                                |
|----------------|--------------------|------------------------------------------------|
| Jorge          | Hernández Vara     | Hospital Universitario Vall d'Hebron           |
| Maria Victoria | González           | Hospital Universitario Vall d'Hebron           |
| Sara           | Belmonte**         | Hospital Universitario Vall d'Hebron           |
| Juan Carlos    | Romero Fábrega     | Hospital Universitario Virgen de las Nieves    |
| Francisco      | Escamilla Sevilla  | Hospital Universitario Virgen de las Nieves    |
| Lucía          | Triguero Cueva     | Hospital Universitario Virgen de las Nieves    |
| Carlos Javier  | Madrid Navarro     | Hospital Universitario Virgen de las Nieves    |
| Rosa           | Yáñez Baña         | Complejo Hospitalario Universitario de Ourense |
| Asunción       | Ávila Rivera       | Complex Hospitalari Moisès Broggi              |
| Núria          | Caballol Pons      | Complex Hospitalari Moisès Broggi              |
| Ana            | Planas-Ballvé      | Complex Hospitalari Moisès Broggi              |
| Alejandro      | Peral Quirós       | Complex Hospitalari Moisès Broggi              |
| Dolors         | Lozano             | Complex Hospitalari Moisès Broggi              |
| Álvaro         | Sánchez Ferro      | Hospital 12 de Octubre                         |
| Pablo          | Rábano Suárez      | Hospital 12 de Octubre                         |
| Antonio        | Méndez Guerrero    | Hospital 12 de Octubre                         |
| Daniel         | Pérez Rangel       | Hospital 12 de Octubre                         |
| Frances        | Valldeoriola Serra | Hospital Clínic                                |
| Rocío          | García Ramos       | Hospital Clínic Universitario San Carlos       |
| Ana            | Fernández Revuelta | Hospital Clínic Universitario San Carlos       |
| Eva            | López Valdés       | Hospital Clínic Universitario San Carlos       |
| Carmen         | Ribacoba Díaz      | Hospital Clínic Universitario San Carlos       |
| Irene          | Martínez-Torres    | Hospital Universitario la Fe                   |
| Carlos         | Morata-Martínez    | Hospital Universitario la Fe                   |
| Raquel         | Baviera-Muñoz      | Hospital Universitario la Fe                   |
| Marina         | Campins Romeu      | Hospital Universitario la Fe                   |
| Isabel         | Sastre Bataller    | Hospital Universitario la Fe                   |
| Pilar          | Sánchez Alonso     | Hospital Puerta de Hierro                      |
| Sabela         | Novo Ponte         | Hospital Puerta de Hierro                      |
| Elisa          | Gamo González      | Hospital Puerta de Hierro                      |
| Raquel         | Martín García      | Hospital Puerta de Hierro                      |
| Pablo          | Mir Rivera         | Hospital Universitario Virgen del Rocío        |
| Laura          | Muñoz Delgado      | Hospital Universitario Virgen del Rocío        |
| Astrid Daniela | Adarmes Gómez      | Hospital Universitario Virgen del Rocío        |
| Elena          | Ojeda Lepe         | Hospital Universitario Virgen del Rocío        |
| Silvia         | Jesús Maestre      | Hospital Universitario Virgen del Rocío        |



It is made available under a [CC-BY 4.0 International license](https://creativecommons.org/licenses/by/4.0/) .

Device-aided therapies in Parkinson's disease

|             |                          |                                            |
|-------------|--------------------------|--------------------------------------------|
| Daniel      | Macías García            | Hospital Universitario Virgen del Rocío    |
| Fátima      | Carrillo García          | Hospital Universitario Virgen del Rocío    |
| Ana María   | Castellano Guerrero***   | Hospital Universitario Virgen del Rocío    |
| Manuela     | San Eufrasio Martínez*** | Hospital Universitario Virgen del Rocío    |
| Cristina    | Pérez Calvo***           | Hospital Universitario Virgen del Rocío    |
| Andrés      | García Herruzo           | Hospital Universitario Virgen del Rocío    |
| Cristina    | Gómez Rapela****         | Hospital Universitario Virgen del Rocío    |
| Lorena      | Garrote Espina****       | Hospital Universitario Virgen del Rocío    |
| Marta       | Blázquez Estrada         | Hospital Universitario Central de Asturias |
| Esther      | Suárez San Martín        | Hospital Universitario Central de Asturias |
| Ciara       | García Fernández         | Hospital Universitario Central de Asturias |
| Patricia    | Prendes Fernández****    | Hospital Universitario Central de Asturias |
| Pedro       | García Ruíz Espiga       | Hospital Fundación Jiménez Díaz            |
| Cici        | Feliz Feliz              | Hospital Fundación Jiménez Díaz            |
| Raúl        | Espinosa Rosso           | Hospital Universitario de Jerez            |
| Lara        | Mauri Fabrega            | Hospital Universitario de Jerez            |
| Jaime       | Kulisevsky Bojarski      | Hospital Sant Pau de Barcelona             |
| Berta       | Pascual Sedano           | Hospital Sant Pau de Barcelona             |
| Javier      | Pagonabarraga            | Hospital Sant Pau de Barcelona             |
| Antonia     | Campolongo**             | Hospital Sant Pau de Barcelona             |
| Marina      | Mata Álvarez-Santullano  | Hospital Universitario Infanta Sofía       |
| Juan Carlos | Gómez Esteban            | Hospital de Cruces                         |
| Tamara      | Fernández Valle          | Hospital de Cruces                         |
| Marta       | Ruiz López               | Hospital de Cruces                         |
| Beatriz     | Tijero Merino            | Hospital de Cruces                         |
| Lydia       | López Manzanares         | Hospital Universitario La Princesa         |
| Inés        | Muro                     | Hospital Universitario La Princesa         |
| Elena       | Casas Peña               | Hospital Universitario La Princesa         |
| Pablo       | Lorenzo Barreto          | Hospital Universitario La Princesa         |
| Maria Pilar | Gil Villar               | Hospital Universitari Arnau de Vilanova    |
| Agustín     | Sancho Saldana           | Hospital Universitari Arnau de Vilanova    |
| Laura       | Quibus Requena           | Hospital Universitari Arnau de Vilanova    |
| Jesús       | Olivares Romero          | Hospital Universitario de Torrecárdenas    |
| Belén       | Rebollo Lavado           | Hospital Universitario de Torrecárdenas    |
| Lucía       | Triguero Cueva*          | Hospital Universitario de Torrecárdenas    |
| Víctor      | Gómez Mayordomo          | Hospitales Vithas                          |

It is made available under a [CC-BY 4.0 International license](https://creativecommons.org/licenses/by/4.0/).

Device-aided therapies in Parkinson's disease

|               |                          |                                                                   |
|---------------|--------------------------|-------------------------------------------------------------------|
| Berta         | Solano Vila              | Hospital Josep Trueta de Girona y Hospital Santa Caterina de Salt |
| Anna          | Cots Foraster            | Hospital Josep Trueta de Girona y Hospital Santa Caterina de Salt |
| Daniel        | López Dominguez          | Hospital Josep Trueta de Girona y Hospital Santa Caterina de Salt |
| Lilian        | Vivas Villacampa         | Hospital Josep Trueta de Girona y Hospital Santa Caterina de Salt |
| Jessica       | González Ardura          | Hospital de Cabueñes                                              |
| Belén         | Castaño García           | Hospital de Cabueñes                                              |
| Antonio       | Sánchez Rodríguez        | Hospital de Cabueñes                                              |
| Sonia         | Escalante Arroyo         | Hospital Virgen de la Cinta                                       |
| Tania         | Delgado Ballester        | Parc Taulí                                                        |
| Débora María  | Cerdán Santacruz         | Hospital General de Segovia                                       |
| Amelia        | Mendoza Rodríguez        | Hospital General de Segovia                                       |
| Ana           | Castrillo Sanz           | Hospital General de Segovia                                       |
| Lorena        | Caballero Sánchez        | Hospital General de Segovia                                       |
| Claudia       | Gómez López de San Román | Hospital General de Segovia                                       |
| Gustavo       | Fernández Pajarín        | Complejo Hospitalario Universitario de Santiago de Compostela     |
| Ángel         | Sesar Ignacio            | Complejo Hospitalario Universitario de Santiago de Compostela     |
| Jordi         | Casanova Mollá           | Hospital Universitario Sant Joan de Reus                          |
| Ángela        | Monterde Ortega          | Hospital Universitario Joan XXIII                                 |
| Susana        | Cantarero Duque          | Hospital Universitario de Móstoles                                |
| Guillermo     | González-Ortega          | Hospital Universitario de Móstoles                                |
| Beatriz       | Fernández Rodríguez      | Hospital Regional Universitario de Málaga                         |
| Teresa        | Muñoz Ruíz               | Hospital Regional Universitario de Málaga                         |
| Gloria        | Martí Andrés             | Hospital Universitario de Navarra, Pamplona, Navarra              |
| Pedro         | Clavero Ibarra           | Hospital Universitario de Navarra, Pamplona, Navarra              |
| Amaia         | Erdocia Goñi             | Hospital Universitario de Navarra, Pamplona, Navarra              |
| Ana Carolina  | López Veloso             | Hospital Universitario Doctor Negrín, Las Palmas de Gran Canaria  |
| Ayoze Nautzet | González Hernández       | Hospital Universitario Doctor Negrín, Las Palmas de Gran Canaria  |
| Juan Diego    | Guerra Hiraldo           | Hospital Universitario Doctor Negrín, Las Palmas de Gran Canaria  |
| Raúl          | Rashid López             | Hospital Puerta del Mar, Cádiz                                    |
| Raúl          | Espinosa Rosso           | Hospital Puerta del Mar, Cádiz                                    |
| Silvia        | Martí Martínez           | Hospital General Universitario Alicante                           |
| Ángel         | Aneiros Díaz             | Complejo Hospitalario Universitario de Ferrol                     |
| Lydia         | Vela                     | Hospital Fundación de Alcorcón                                    |
| Javier        | Ruíz Martínez            | Hospital Universitario Donostia                                   |
| Elisabet      | Mondragón Rezola         | Hospital Universitario Donostia                                   |
| Ana           | Vinagre Aragón           | Hospital Universitario Donostia                                   |

It is made available under a [CC-BY 4.0 International license](#) .

Device-aided therapies in Parkinson's disease

|        |                  |                               |
|--------|------------------|-------------------------------|
| Javier | Gutiérrez García | Complejo Hospitalario Granada |
|--------|------------------|-------------------------------|

477

478 The researchers are listed by center in chronological order according to the date they confirmed their participation in  
479 the project.

480 \* This investigator works at 2 different centers.

481 All investigators are neurologists except those ones with the symbol: \*\* SN (specialized nurse); \*\*\*graduate in Biology

482 (she will be responsible for remote data monitoring); \*\*\*\*neuropsychologist; \*\*\*\*\* , study coordinator.

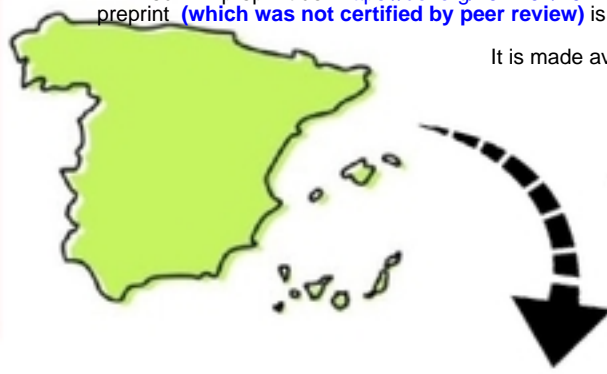

All PD patients treated with a DAT in more than 40 centers participating

10 years of recruitment period and follow-up

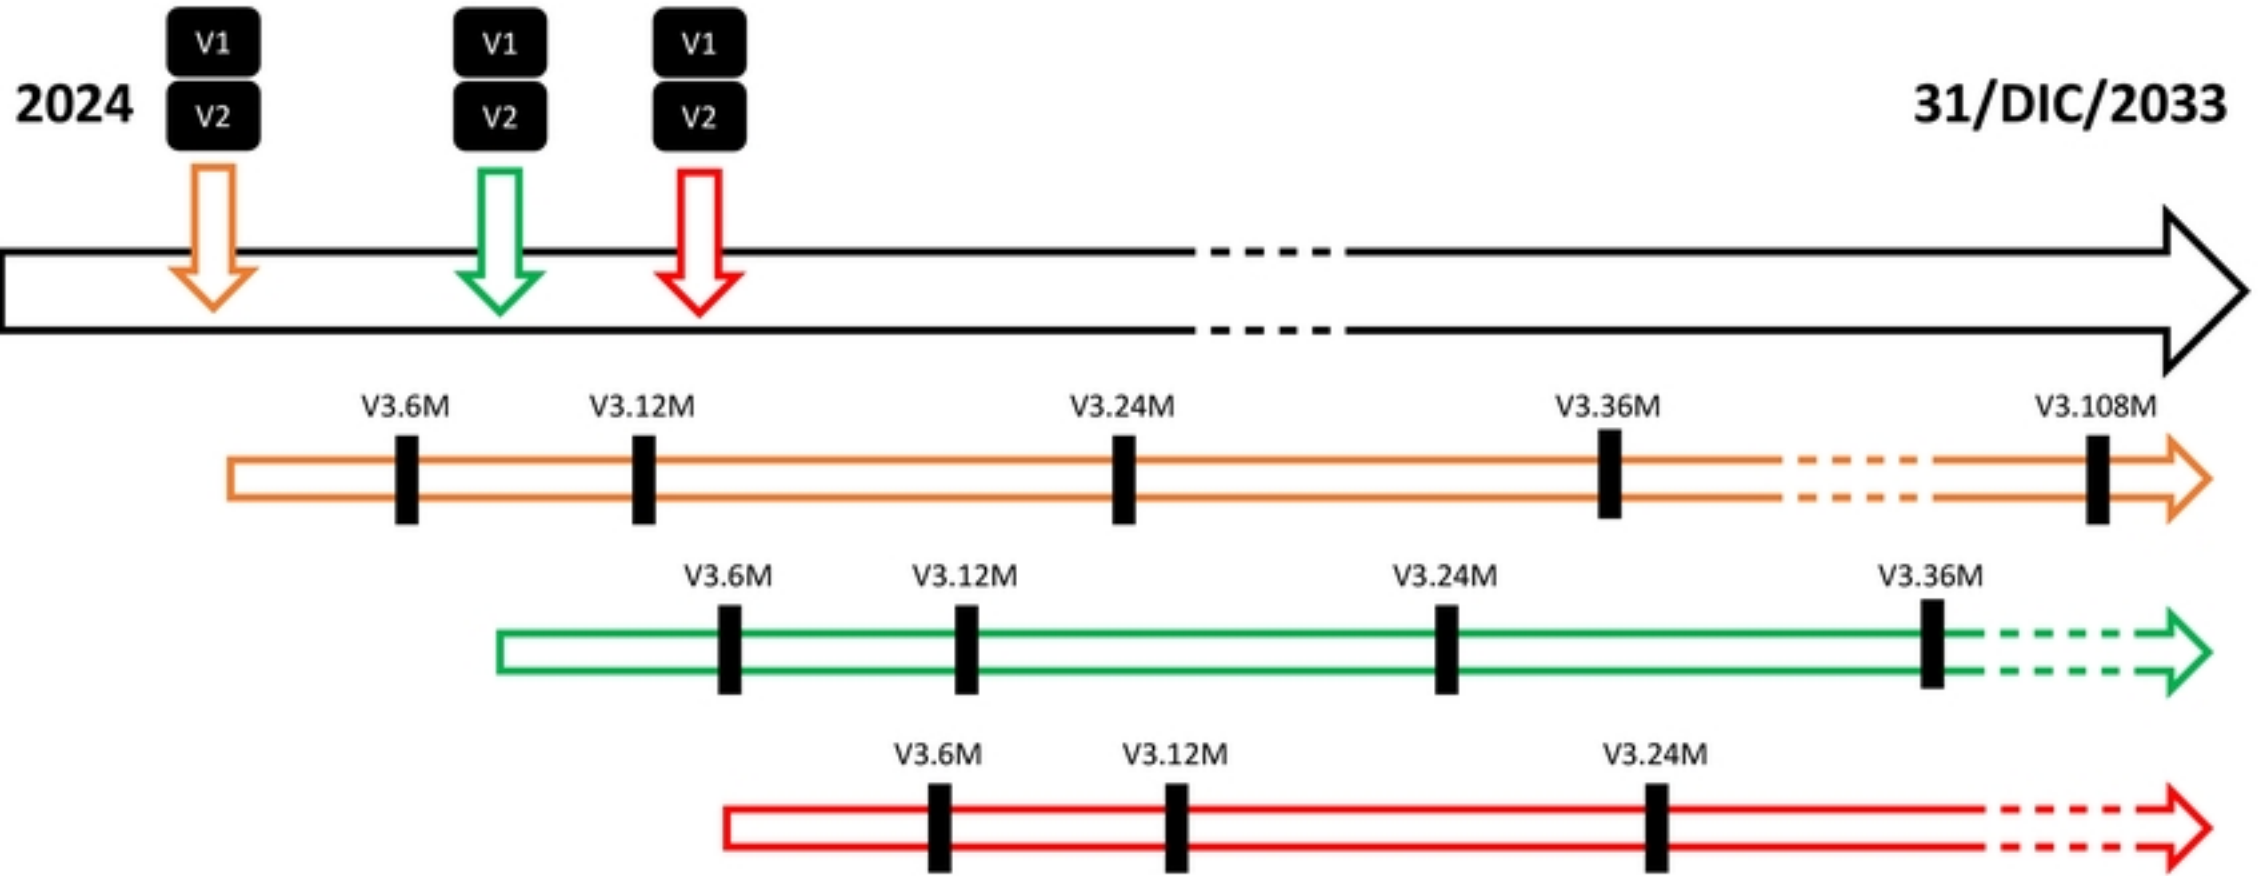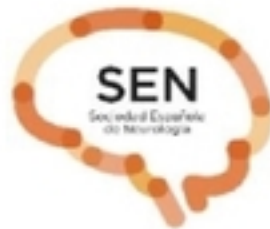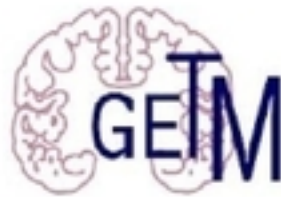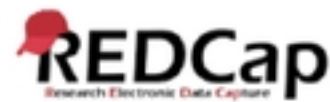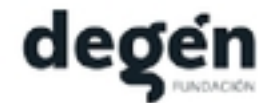

Figure
